# Supplementary material for: Structural Study of a La(III) Complex of a 1,2,3-Triazole Ligand with Antioxidant Activity
Source: MDPI journal article supplement (doi:10.3390/antiox12101872), 2023-10-17
Supplement: s1 [file s1]

## SUPPLEMENTARY MATERIAL

### 1,2,3-triazole-Lanthanide complex with anticancer activity: structural and spectroscopy

M. Alcolea Palafox<sup>a\*</sup>, Nataliya P. Belskaya<sup>b</sup>, Lozan Todorov<sup>c</sup>, Irena P. Kostova<sup>c</sup>

<sup>a</sup> Departamento de Química Física, Facultad de Ciencias Químicas, Universidad Complutense, Madrid-28040, Spain (alcolea@ucm.es)

<sup>b</sup> Department of Technology for Organic Synthesis, Ural Federal University, 19 Mira Str., Yekaterinburg 620012, Russia; n.p.belskaya@urfu.ru

<sup>c</sup> Department of Chemistry, Faculty of Pharmacy, Medical University – Sofia, 2 Dunav Str., Sofia, Bulgaria

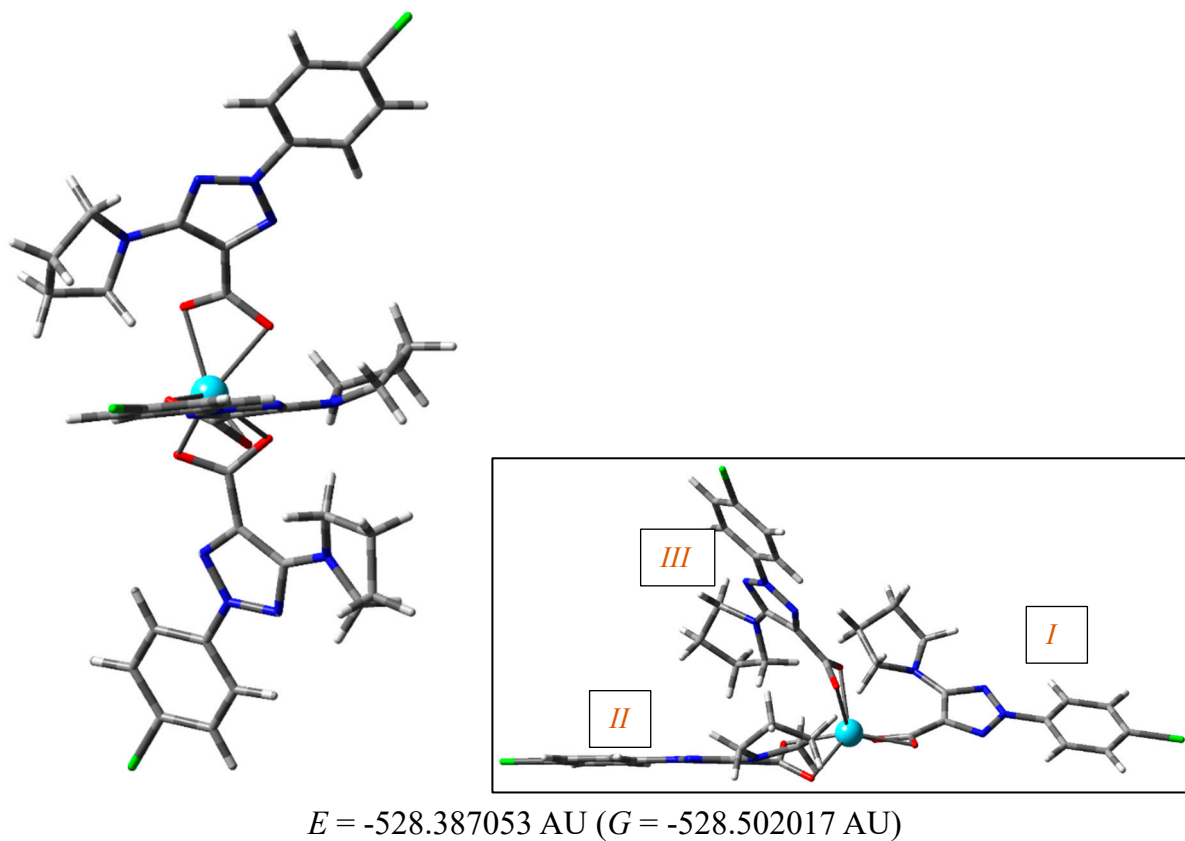

**Figure S1.** Labeling of the atoms and plot of the optimized  $\text{La}(\mathbf{2b})_3$  structure with **2b**: sodium 2-(4-chlorophenyl)-5-(pyrrolidineidin-1-yl)-2H-1,2,3-triazole-4-carboxylate at the B3LYP/Cep-4g level.
